# Supplementary material for: Trends in age and prostate-specific antigen at prostate cancer diagnosis between 2010 and 2019
Source: PubMed Central journal article supplement (PMC11578289; doi:10.1093/jncics/pkae106), 2024-10-23
Supplement: pkae106_supplementary_data.pdf [file pkae106_supplementary_data.pdf]

**Supplementary Materials for “Trends in Age and Prostate-Specific Antigen at Prostate Cancer  
Diagnosis between 2010 and 2019”**

Lukas Owens, Ojas Brahme, Roman Gulati, Ruth Etzioni

Division of Public Health Sciences, Fred Hutchinson Cancer Center, Seattle, WA, USA

**Supplementary Table 1**

Quantile regression of age at diagnosis on (A) year of diagnosis and (B) year of diagnosis and race and ethnic origin in Surveillance, Epidemiology and End Results database from 2010 to 2019

|                          | 25 <sup>th</sup> percentile |              |         | 50 <sup>th</sup> percentile |              |         | 75 <sup>th</sup> percentile |              |         | 85 <sup>th</sup> percentile |              |         |
|--------------------------|-----------------------------|--------------|---------|-----------------------------|--------------|---------|-----------------------------|--------------|---------|-----------------------------|--------------|---------|
|                          | Coefficient                 | 95% CI       | p-value | Coefficient                 | 95% CI       | p-value | Coefficient                 | 95% CI       | p-value | Coefficient                 | 95% CI       | p-value |
| <b>(A) Year Only</b>     |                             |              |         |                             |              |         |                             |              |         |                             |              |         |
| Intercept                | 56.00                       | 55.92, 56.08 | <0.001  | 61.86                       | 61.82, 61.89 | <0.001  | 67.00                       | 66.97, 67.03 | <0.001  | 70.00                       | 69.82, 70.18 | <0.001  |
| Year                     | 0.25                        | 0.24, 0.26   | <0.001  | 0.14                        | 0.13, 0.15   | <0.001  | 0.14                        | 0.13, 0.15   | <0.001  | 0.14                        | 0.11, 0.17   | <0.001  |
| <b>(B) Year and Race</b> |                             |              |         |                             |              |         |                             |              |         |                             |              |         |
| Intercept                | 56.75                       | 56.66, 56.84 | <0.001  | 62.20                       | 62.11, 62.29 | <0.001  | 67.40                       | 67.31, 67.49 | <0.001  | 70.71                       | 70.58, 70.85 | <0.001  |
| Year                     | 0.25                        | 0.23, 0.27   | <0.001  | 0.20                        | 0.18, 0.22   | <0.001  | 0.20                        | 0.19, 0.21   | <0.001  | 0.14                        | 0.12, 0.16   | <0.001  |
| Race                     |                             |              |         |                             |              |         |                             |              |         |                             |              |         |
| NH White                 | –                           | –            | –       | –                           | –            | –       | –                           | –            | –       | –                           | –            | –       |
| NH Black                 | -2.75                       | -2.96, -2.54 | <0.001  | -2.53                       | -2.72, -2.34 | <0.001  | -2.40                       | -2.54, -2.26 | <0.001  | -2.71                       | -2.85, -2.58 | <0.001  |
| Hispanic                 | -1.08                       | -1.34, -0.83 | <0.001  | -0.20                       | -0.47, 0.07  | 0.146   | -0.40                       | -0.58, -0.22 | <0.001  | -0.71                       | -0.85, -0.58 | <0.001  |
| NH API                   | 1.25                        | 0.97, 1.53   | <0.001  | 0.80                        | 0.45, 1.15   | <0.001  | 1.60                        | 1.18, 2.02   | <0.001  | 1.29                        | 1.00, 1.57   | <0.001  |
| NH AI/AN                 | 0.12                        | -2.11, 2.36  | 0.913   | 0.80                        | 0.71, 0.89   | <0.001  | -0.40                       | -2.63, 1.83  | 0.725   | -0.71                       | -3.39, 1.96  | 0.601   |
| Year : Race              |                             |              |         |                             |              |         |                             |              |         |                             |              |         |
| NH White                 | –                           | –            | –       | –                           | –            | –       | –                           | –            | –       | –                           | –            | –       |
| NH Black                 | 0.00                        | -0.03, 0.03  | >0.999  | -0.03                       | -0.06, 0.00  | 0.033   | -0.08                       | -0.10, -0.05 | <0.001  | -0.14                       | -0.18, -0.11 | <0.001  |
| Hispanic                 | -0.08                       | -0.12, -0.05 | <0.001  | -0.20                       | -0.24, -0.16 | <0.001  | -0.20                       | -0.25, -0.15 | <0.001  | -0.14                       | -0.19, -0.10 | <0.001  |
| NH API                   | -0.08                       | -0.14, -0.02 | 0.007   | 0.02                        | -0.04, 0.09  | 0.492   | -0.20                       | -0.30, -0.10 | <0.001  | -0.14                       | -0.23, -0.06 | 0.001   |
| NH AI/AN                 | -0.12                       | -0.53, 0.28  | 0.548   | -0.20                       | -0.22, -0.18 | <0.001  | -0.09                       | -0.50, 0.32  | 0.669   | -0.03                       | -0.52, 0.46  | 0.899   |

CI: confidence interval; NH: Non-Hispanic; API: Asian/Pacific Islander; AI/AN: American Indian/Alaska Native

**Supplementary Table 2**

Quantile regression of PSA at diagnosis on (A) year of diagnosis and (B) year of diagnosis and race and ethnic origin in Surveillance, Epidemiology and End Results database from 2010 to 2019

|                          | 25 <sup>th</sup> percentile |             |         | 50 <sup>th</sup> percentile |             |         | 75 <sup>th</sup> percentile |             |         | 85 <sup>th</sup> percentile |              |         |
|--------------------------|-----------------------------|-------------|---------|-----------------------------|-------------|---------|-----------------------------|-------------|---------|-----------------------------|--------------|---------|
|                          | Coefficient                 | 95% CI      | p-value | Coefficient                 | 95% CI      | p-value | Coefficient                 | 95% CI      | p-value | Coefficient                 | 95% CI       | p-value |
| <b>(A) Year Only</b>     |                             |             |         |                             |             |         |                             |             |         |                             |              |         |
| Intercept                | 4.55                        | 4.54, 4.56  | <0.001  | 6.01                        | 5.99, 6.04  | <0.001  | 9.40                        | 9.33, 9.47  | <0.001  | 13.60                       | 13.42, 13.78 | <0.001  |
| Year                     | 0.08                        | 0.07, 0.08  | <0.001  | 0.14                        | 0.14, 0.15  | <0.001  | 0.34                        | 0.32, 0.35  | <0.001  | 0.80                        | 0.75, 0.85   | <0.001  |
| <b>(B) Year and Race</b> |                             |             |         |                             |             |         |                             |             |         |                             |              |         |
| Intercept                | 4.42                        | 4.41, 4.44  | <0.001  | 5.83                        | 5.81, 5.86  | <0.001  | 8.70                        | 8.63, 8.77  | <0.001  | 12.00                       | 11.83, 12.17 | <0.001  |
| Year                     | 0.08                        | 0.07, 0.08  | <0.001  | 0.13                        | 0.13, 0.14  | <0.001  | 0.30                        | 0.28, 0.32  | <0.001  | 0.65                        | 0.61, 0.69   | <0.001  |
| Race                     |                             |             |         |                             |             |         |                             |             |         |                             |              |         |
| NH White                 | –                           | –           | –       | –                           | –           | –       | –                           | –           | –       | –                           | –            | –       |
| NH Black                 | 0.38                        | 0.33, 0.42  | <0.001  | 0.82                        | 0.73, 0.92  | <0.001  | 2.90                        | 2.61, 3.19  | <0.001  | 7.20                        | 6.30, 8.10   | <0.001  |
| Hispanic                 | 0.33                        | 0.28, 0.38  | <0.001  | 0.62                        | 0.53, 0.72  | <0.001  | 1.71                        | 1.42, 2.01  | <0.001  | 3.82                        | 2.95, 4.70   | <0.001  |
| NH API                   | 0.58                        | 0.52, 0.63  | <0.001  | 1.04                        | 0.91, 1.18  | <0.001  | 2.30                        | 1.86, 2.74  | <0.001  | 4.50                        | 3.55, 5.45   | <0.001  |
| NH AI/AN                 | 0.87                        | 0.54, 1.21  | <0.001  | 2.09                        | 1.41, 2.78  | <0.001  | 7.50                        | 3.55, 11.45 | <0.001  | 29.90                       | 9.19, 50.61  | 0.005   |
| Year : Race              |                             |             |         |                             |             |         |                             |             |         |                             |              |         |
| NH White                 | –                           | –           | –       | –                           | –           | –       | –                           | –           | –       | –                           | –            | –       |
| NH Black                 | 0.00                        | -0.01, 0.01 | >0.999  | 0.01                        | -0.01, 0.03 | 0.299   | 0.13                        | 0.06, 0.19  | <0.001  | 0.46                        | 0.25, 0.67   | <0.001  |
| Hispanic                 | 0.00                        | -0.01, 0.01 | 0.492   | 0.01                        | -0.01, 0.03 | 0.341   | 0.19                        | 0.11, 0.26  | <0.001  | 0.73                        | 0.49, 0.96   | <0.001  |
| NH API                   | 0.00                        | -0.01, 0.01 | >0.999  | -0.01                       | -0.04, 0.02 | 0.542   | 0.05                        | -0.04, 0.14 | 0.268   | 0.15                        | -0.10, 0.40  | 0.244   |
| NH AI/AN                 | 0.00                        | -0.07, 0.07 | >0.999  | -0.06                       | -0.19, 0.07 | 0.381   | 0.10                        | -0.55, 0.75 | 0.763   | -0.95                       | -4.30, 2.40  | 0.578   |

PSA: Prostate-specific antigen; CI: confidence interval; NH: Non-Hispanic; API: Asian/Pacific Islander; AI/AN: American Indian/Alaska Native
